# Supplementary material for: Mutator Suppression and Escape from Replication Error–Induced Extinction in Yeast
Source: PLOS journal article supplement (doi:10.1371/journal.pgen.1002282), 2011-10-06
Supplement: S2 (10.1371/journal.pgen.1002282.s002) [file journal.pgen.1002282.s002]

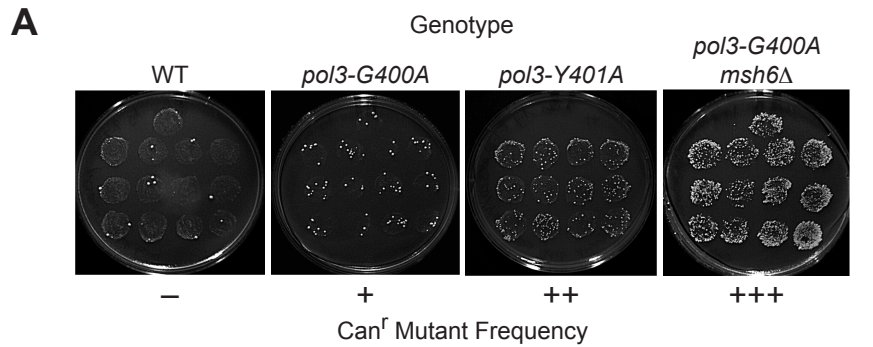

**B**

| <i>POL3</i><br>allele           | Mutant Frequency <sup>a</sup> |                        | <i>POL3</i><br>allele           | Mutant Frequency |                        |
|---------------------------------|-------------------------------|------------------------|---------------------------------|------------------|------------------------|
|                                 | <i>MSH6</i>                   | <i>msh6Δ</i>           |                                 | <i>MSH6</i>      | <i>msh6Δ</i>           |
| Wild type                       | -                             | +                      | <u>Exo II motif (continued)</u> |                  |                        |
| <u>Exo I motif</u>              |                               |                        | <i>P409A</i>                    | -                | +                      |
| <i>R316A</i>                    | -                             | +                      | <i>Y410A</i>                    | -/+              | ++/+++                 |
| <i>D321A</i>                    | ++                            | ND <sup>b</sup>        | <i>L411A</i>                    | -                | +                      |
| <i>D321A,E323A</i> <sup>c</sup> | ++                            | no growth              | <i>L412A</i>                    | -                | +                      |
| <i>G329A</i>                    | -                             | +                      | <i>N413A</i>                    | -                | +                      |
| <u>Exo II motif</u>             |                               |                        | <u>Exo III motif</u>            |                  |                        |
| <i>P395A</i>                    | -                             | +                      | <i>D506A/N</i> <sup>f,h</sup>   | -                | +                      |
| <i>D396A</i> <sup>d</sup>       | +                             | ++/+++ <sup>e</sup>    | <i>S507A/N</i> <sup>f,h</sup>   | -                | +                      |
| <i>V397A</i>                    | -                             | +                      | <i>E508A/N</i> <sup>f,h</sup>   | -                | +                      |
| <i>I398A</i>                    | -                             | +                      | <i>R511A/H</i> <sup>f,h</sup>   | -                | +                      |
| <i>I399A</i>                    | -                             | +                      | <i>R512A</i>                    | -                | +                      |
| <i>G400A</i>                    | -/+                           | +++                    | <i>Y516F/T/S/I</i> <sup>f</sup> | ++               | no growth <sup>i</sup> |
| <i>Y401A</i>                    | +/++                          | +++ <sup>e</sup>       | <i>D520A/T/V</i> <sup>f</sup>   | +/++             | ND <sup>e,j</sup>      |
| <i>N402A</i>                    | -                             | +                      | <u>Other</u>                    |                  |                        |
| <i>T403A</i>                    | -                             | +                      | <i>G447S</i>                    | -                | +                      |
| <i>T404A</i>                    | -                             | +                      | <i>R459A</i> <sup>d</sup>       | -/+              | +++                    |
| <i>N405A</i>                    | -                             | +                      | <i>D463A</i>                    | +/++             | +++ <sup>e</sup>       |
| <i>F406A</i>                    | ++                            | no growth              | <i>S476A</i>                    | -                | +                      |
| <i>D407A/E/N/G</i> <sup>f</sup> | ++                            | no growth <sup>g</sup> | <i>K491R</i>                    | +                | ++/+++ <sup>e</sup>    |
| <i>I408A</i>                    | -                             | +                      |                                 |                  |                        |

<sup>a</sup> Representative examples of —, +, ++ and +++ mutant frequencies are shown in panel A. Assayed in the isogenic *MSH6* and *msh6Δ* strains YP6 and MP4, respectively.

<sup>b</sup> ND, not determined.

<sup>c</sup> *pol3-01* allele (Morrison *et al.*, 1993).

<sup>d</sup> Temperature-sensitive: normal growth at 30°C; no growth at 37°C.

<sup>e</sup> Slow growth.

<sup>f</sup> Slash (/) separates different individual *POL3* alleles assayed at this codon.

<sup>g</sup> Only the *D407A* allele was examined in *msh6Δ* cells.

<sup>h</sup> Mutator phenotypes assessed by fluctuation assays. — and + correspond to ≤3-fold and 10- to 20-fold increases in Can<sup>r</sup> mutation rate relative to the wild-type strain, respectively. The mutation rates for wild type and *msh6Δ* were 2.0 × 10<sup>-7</sup> and 2.5 × 10<sup>-6</sup>, respectively, in these experiments.

<sup>i</sup> Only the *Y516F* allele was examined in *msh6Δ* cells.

<sup>j</sup> Only the *D520A* allele was examined for growth in *msh6Δ* cells.
